# Supplementary material
Source: PubMed Central journal article supplement (PMC10924708)
Supplement: jama-e241361-s003.pdf [file jama-e241361-s003.pdf]

\*First name, last name, and suffix (if applicable) are required and will appear in PubMed.

| <b>*Group Name(s): AGENT IDE Investigators</b> |                   |                              |                         |                                                              |                                                 |                                                                |                                                                                                   |
|------------------------------------------------|-------------------|------------------------------|-------------------------|--------------------------------------------------------------|-------------------------------------------------|----------------------------------------------------------------|---------------------------------------------------------------------------------------------------|
| <b>*First Name and Middle Initial(s)</b>       | <b>*Last Name</b> | <b>*Suffix (eg, Jr, III)</b> | <b>Academic Degrees</b> | <b>Institution</b>                                           | <b>Location (city, state/province, country)</b> | <b>Role or Contribution, eg, chair, principal investigator</b> | <b>Group (if more than 1 Group listed in the byline) and/or Subgroup (eg, Steering Committee)</b> |
| Richard                                        | Shlofmitz         |                              | MD                      | St. Francis Hospital                                         | Roslyn, NY, USA                                 | Principal Investigator                                         |                                                                                                   |
| Jeffrey                                        | Moses             |                              | MD                      | Columbia University Medical Center                           | New York, NY, USA                               | Principal Investigator                                         |                                                                                                   |
| William                                        | Bachinsky         |                              | MD                      | Pinnacle Health Cardiovascular Institute                     | Wormleysburg, PA, USA                           | Principal Investigator                                         |                                                                                                   |
| Suhail                                         | Dohad             |                              | MD                      | Cedars - Sinai Medical Center                                | Los Angeles, CA, USA                            | Principal Investigator                                         |                                                                                                   |
| Steven                                         | Rudick            |                              | MD                      | Lindner Center for Research and Education at Christ Hospital | Cincinnati, OH, USA                             | Principal Investigator                                         |                                                                                                   |
| Robert                                         | Stoler            |                              | MD                      | Baylor Heart & Vascular Hospital                             | Dallas, TX, USA                                 | Principal Investigator                                         |                                                                                                   |
| Brian                                          | Jefferson         |                              | MD                      | Centennial Medical Center                                    | Nashville, TN, USA                              | Principal Investigator                                         |                                                                                                   |
| William                                        | Nicholson         |                              | MD                      | Emory University Hospital                                    | Atlanta, GA, USA                                | Principal Investigator                                         |                                                                                                   |
| John                                           | Altman            |                              | MD                      | St. Anthony Hospital                                         | Denver, CO, USA                                 | Principal Investigator                                         |                                                                                                   |
| Robert                                         | Yeh               |                              | MD                      | Beth Israel Deaconess Medical Center                         | Boston, MA, USA                                 | Principal Investigator                                         |                                                                                                   |
| Cynthia Tjan                                   | Bateman           |                              | MD                      | South Denver Cardiology Associates, PC                       | Littleton, CO, USA                              | Principal Investigator                                         |                                                                                                   |
| Amar                                           | Krishnaswamy      |                              | MD                      | Cleveland Clinic Foundation                                  | Cleveland, OH, USA                              | Principal Investigator                                         |                                                                                                   |
| J. Aaron                                       | Grantham          |                              | MD                      | St. Luke's Hospital of Kansas City                           | Kansas City, MO, USA                            | Principal Investigator                                         |                                                                                                   |
| Francis                                        | Zidar             |                              | MD                      | Heart Hospital of Austin                                     | Austin, TX, USA                                 | Principal Investigator                                         |                                                                                                   |
| Rajendran                                      | Sabapathy         |                              | MD                      | Overland Park Regional Medical Center                        | Overland Park, KS, USA                          | Principal Investigator                                         |                                                                                                   |
| Jennifer                                       | Tremmel           |                              | MD                      | Stanford University Medical Center                           | Stanford, CA, USA                               | Principal Investigator                                         |                                                                                                   |
| Cindy                                          | Grines            |                              | MD                      | Northside Hospital                                           | Lawrenceville, GA, USA                          | Principal Investigator                                         |                                                                                                   |
| Mustafa                                        | Ahmed             |                              | MD                      | University of Alabama at Birmingham                          | Birmingham, AL, USA                             | Principal Investigator                                         |                                                                                                   |
| Azeem                                          | Latib             |                              | MD                      | Montefiore Medical Center                                    | Bronx, NY, USA                                  | Principal Investigator                                         |                                                                                                   |
| Behnam                                         | Tehrani           |                              | MD                      | Inova Fairfax Hospital                                       | Falls Church, VA, USA                           | Principal Investigator                                         |                                                                                                   |
| Khaldoon                                       | Alaswad           |                              | MD                      | Henry Ford Hospital                                          | Detroit, MI, USA                                | Principal Investigator                                         |                                                                                                   |
| Carey                                          | Kimmelstiel       |                              | MD                      | Tufts Medical Center                                         | Boston, MA, USA                                 | Principal Investigator                                         |                                                                                                   |
| William                                        | Dixon             |                              | MD                      | Tallahassee Memorial Hospital                                | Tallahassee, FL, USA                            | Principal Investigator                                         |                                                                                                   |
| Arthur                                         | Reitman           |                              | MD                      | Wellstar Kennestone Hospital                                 | Marietta, GA, USA                               | Principal Investigator                                         |                                                                                                   |
| Lawrence                                       | Ang               |                              | MD                      | University of California, San Diego                          | La Jolla, CA, USA                               | Principal Investigator                                         |                                                                                                   |
| Justin                                         | Levisay           |                              | MD                      | Evanston Hospital                                            | Evanston, IL, USA                               | Principal Investigator                                         |                                                                                                   |
| Jinnette                                       | Abbott            |                              | MD                      | Rhode Island Hospital                                        | Providence, RI, USA                             | Principal Investigator                                         |                                                                                                   |
| Kathleen                                       | Kearney           |                              | MD                      | University of Washington Medical Center                      | Seattle, WA, USA                                | Principal Investigator                                         |                                                                                                   |
| Farouc                                         | Jaffer            |                              | MD                      | Massachusetts General Hospital                               | Boston, MA, USA                                 | Principal Investigator                                         |                                                                                                   |
| Saroj                                          | Neupane           |                              | MD                      | Wake Medical Center                                          | Raleigh, NC, USA                                | Principal Investigator                                         |                                                                                                   |
| Kevin                                          | Croce             |                              | MD                      | Brigham and Women's Hospital                                 | Boston, MA, USA                                 | Principal Investigator                                         |                                                                                                   |
| Kendrick                                       | Shunk             |                              | MD                      | San Francisco Veterans Affairs Medical Center                | San Francisco, CA, USA                          | Principal Investigator                                         |                                                                                                   |
| Angela                                         | Taylor            |                              | MD                      | University of Virginia Medical Center                        | Charlottesville, VA, USA                        | Principal Investigator                                         |                                                                                                   |
| Matthew                                        | Saybolt           |                              | MD                      | Jersey Shore University Medical Center                       | Eatontown, NJ, USA                              | Principal Investigator                                         |                                                                                                   |
| Claro                                          | Diaz              |                              | MD                      | Methodist North Hospital                                     | Germantown, TN, USA                             | Principal Investigator                                         |                                                                                                   |
| Alpesh                                         | Shah              |                              | MD                      | The Methodist Hospital Research Institute                    | Houston, TX, USA                                | Principal Investigator                                         |                                                                                                   |
| Kapil                                          | Lotun             |                              | MD                      | Carondelet Medical Group                                     | Tucson, AZ, USA                                 | Principal Investigator                                         |                                                                                                   |
| Johannes                                       | Brechtken         |                              | MD                      | Regions Hospital                                             | St. Paul, MN, USA                               | Principal Investigator                                         |                                                                                                   |
| Himanshu                                       | Agarwal           |                              | MD                      | Bergan Cardiology                                            | Omaha, NE, USA                                  | Principal Investigator                                         |                                                                                                   |
| Rajan                                          | Patel             |                              | MD                      | Ochsner Clinic Foundation                                    | New Orleans, LA, USA                            | Principal Investigator                                         |                                                                                                   |
