# Supplementary material
Source: PubMed Central journal article supplement (PMC10924708)
Supplement: jama-e241361-s004.pdf [file jama-e241361-s004.pdf]

## **Data Sharing Statement**

Yeh. Paclitaxel-Coated Balloon vs Uncoated Balloon for Coronary In-Stent Restenosis. *JAMA*.  
Published March 09, 2024. doi:10.1001/jama.2024.1361

### **Data**

**Data available:** No
